# Supplementary material
Source: Springer Nature journal article supplement (https://iris.cnr.it/retrieve/2fdb4ee9-57b0-4814-b5a3-495deefdf84b/344_2026_12119_MOESM2_ESM.docx)
Supplement: MOESM2 [file 344_2026_12119_MOESM2_ESM.docx]

**Figure S1**


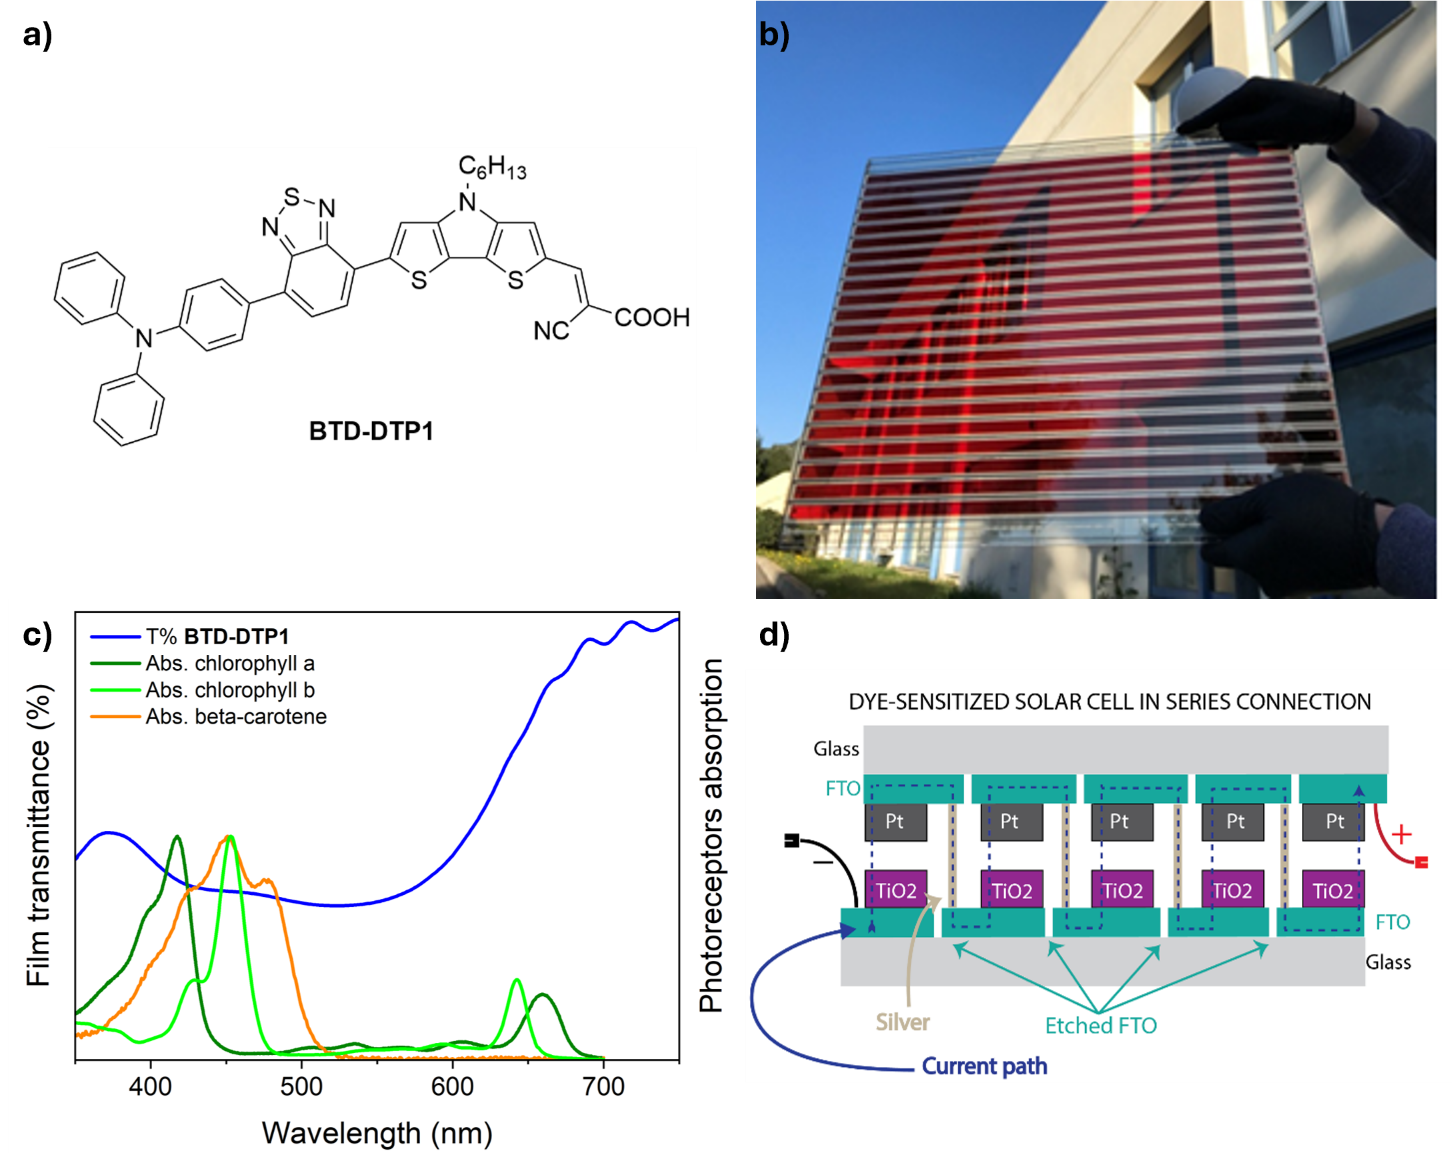


**Figure S1.** a) Structure of the **BTD-DTP1** dye; b) The semi-transparent **BTD-DTP1**-based DSSC module (47×38 cm2) with 22 serially connected individual solar stripes used for the experiments; c) Comparison between the transmission spectra of dye **BTD-DTP1** adsorbed on a thin transparent TiO2 film and the UV-Vis absorption spectra of the most common plant photoreceptors (chlorophyll a, chlorophyll b, β-carotene); d) Schematic representation of the electrical interconnection among individual solar cells in the DSSC panel.

**Figure S2**


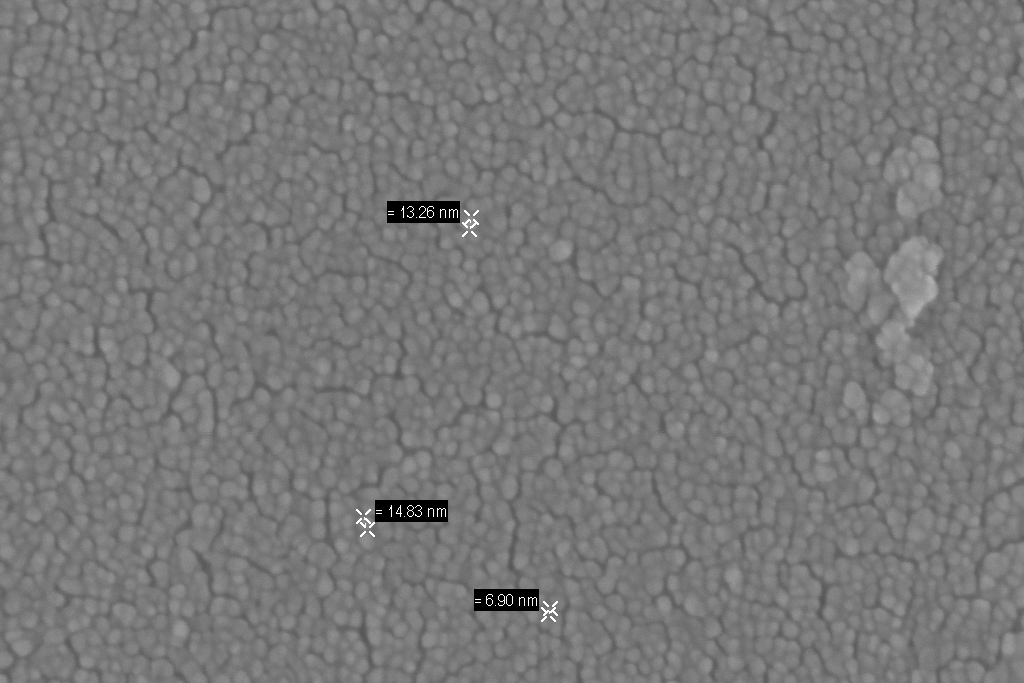


**Figure S2.** Representative SEM cross section image for determination of TiO2 layer thickness.


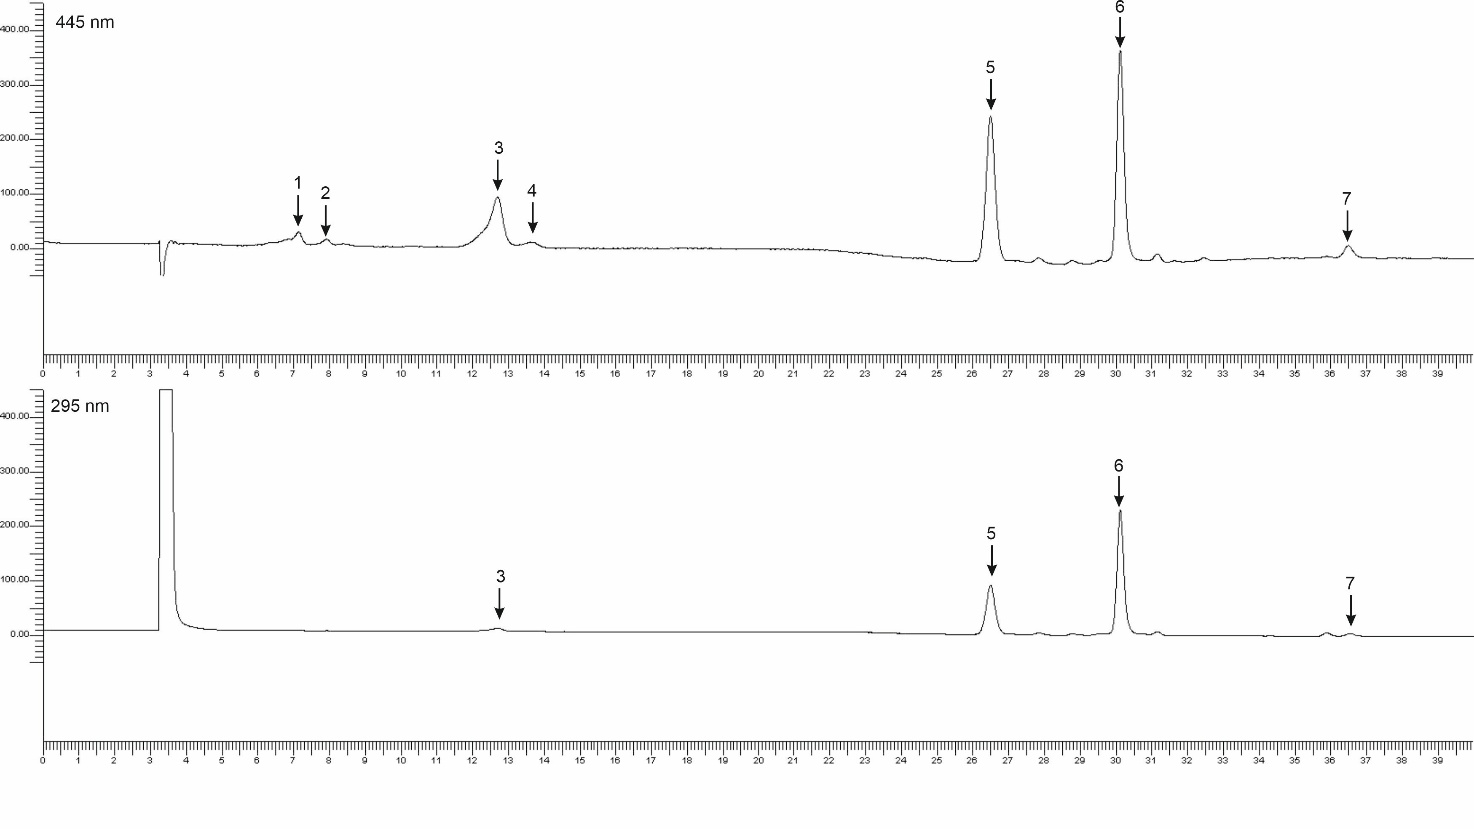
**Figure S3**

**Figure S3.** Representative chromatograms of the Cichorium intybus leaf extracts, acquired at 445 and 295 nm, showing the main carotenoids detected. Peaks: 1–neoxanthin; 2-violaxanthin; 3-lutein; 4-zeaxanthin; 5-chlorophyll b; 6-chlorophyll a; 7-β-carotene.

**Figure S4**


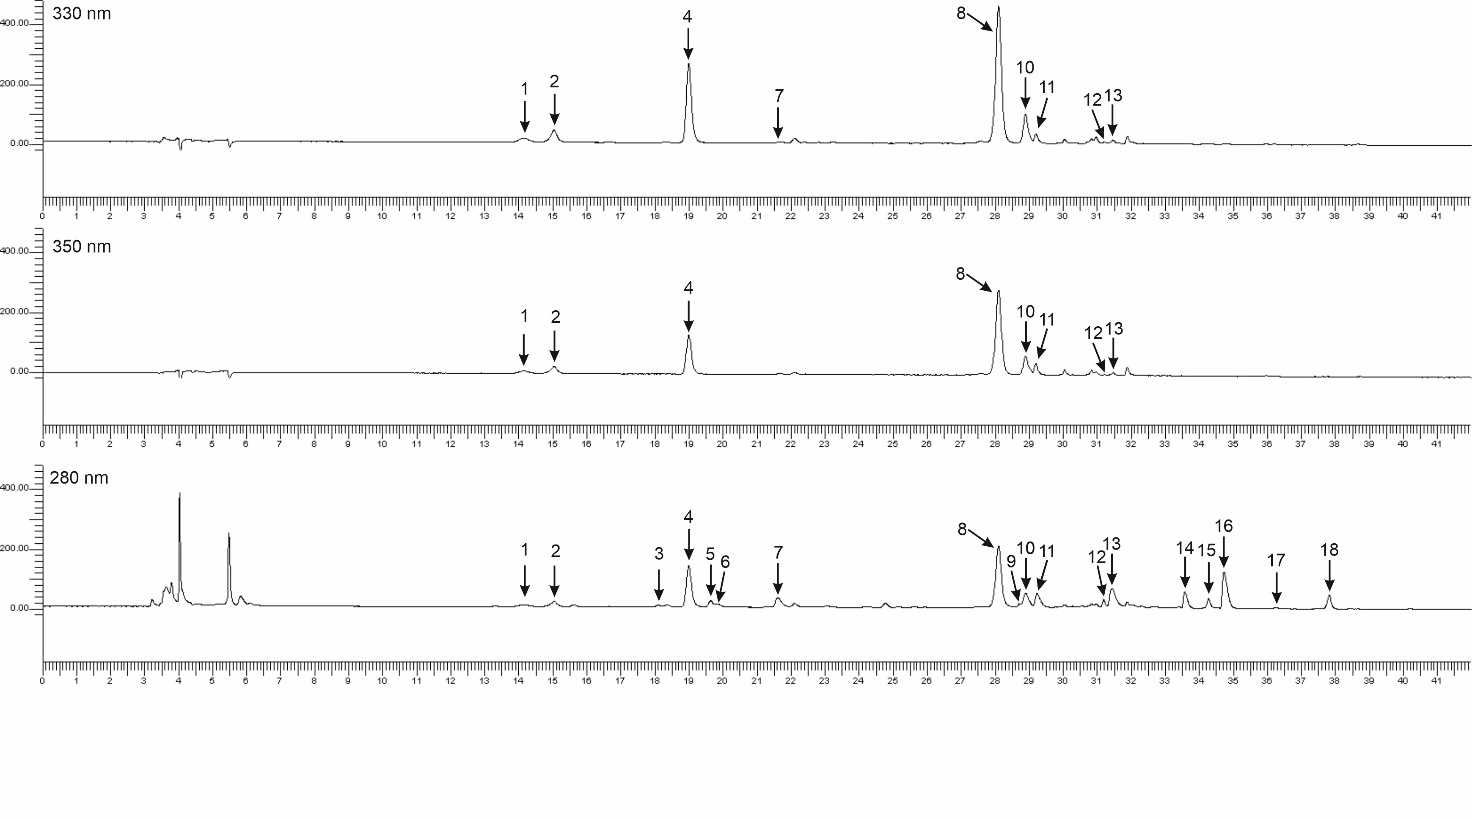


**Figure S4.** Representative chromatograms of the *Cichorium intybus* dry leaf extracts, acquired at 330, 350 and 280 nm, showing the main compounds detected. Peaks: 1-caffeic acid derivative, 2- caftaric acid, 3- epigallocatechin derivative, 4-chlorogenic acid, 5-epigallocatechin derivative, 6-epigallocatechin, 7-epigallocatechin derivative, 8- cichoric acid, 9-epigallocatechin derivative, 10-caffeic acid derivative, 11- kaempferol-3-O-glucuronide, 12-18- epigallocatechin derivatives.
